# Supplementary material for: Heme-dependent Inactivation of 5-Aminolevulinate Synthase from Caulobacter crescentus
Source: PubMed Central journal article supplement (PMC6154995; doi:10.1038/s41598-018-32591-z), 2018-09-21
Supplement: 41598_2018_32591_MOESM1_ESM.pdf [file 41598_2018_32591_MOESM1_ESM.pdf]

Supplementary Information

**Heme-dependent Inactivation of 5-Aminolevulinate Synthase from  
*Caulobacter crescentus***

Hiroko Ikushiro, Atsushi Nagami, Tomoko Takai, Taiki Sawai,  
Yuki Shimeno, Hiroshi Hori, Ikuko Miyahara, Nobuo Kamiya,  
Takato Yano

## Supplementary Methods

### Kinetic data analysis

ALAS catalysis was shown to follow the ordered Bi-Bi mechanism in which glycine binds to the enzyme prior to succinyl-CoA and 5-aminolevulinic acid dissociates last<sup>1</sup> as shown in Supplementary Figure S1A.

The initial velocity equation for this mechanism was as follows<sup>2</sup>:

$$v = \frac{V_{max}[Gly][SucCoA]}{K_s^{Gly}K_m^{SCoA} + K_m^{SCoA}[Gly] + K_m^{Gly}[SucCoA] + [Gly][SucCoA]} \quad \dots\dots \quad (1)$$

where  $[Gly]$  and  $[SucCoA]$  are the concentrations of glycine and succinyl-CoA, respectively.  $K_m^{Gly}$  is the limiting Michaelis constant for glycine when the succinyl-CoA concentration is saturating,  $K_m^{SCoA}$  is the limiting Michaelis constant for succinyl-CoA when the glycine concentration is saturating, and  $K_s^{Gly}$  is the limiting value of the Michaelis constant for glycine when the succinyl-CoA concentration approaches zero. When  $[SucCoA]$  is varied at fixed  $[Gly]$ , the  $1/v$  coordinate for each substrate concentration in the Lineweaver–Burk double reciprocal plot is given by:

$$\frac{1}{v} = \frac{K_m^{SCoA}}{V_{max}} \left( 1 + \frac{K_s^{Gly}}{[Gly]} \right) \frac{1}{[SucCoA]} + \frac{1}{V_{max}} \left( 1 + \frac{K_m^{Gly}}{[Gly]} \right) \quad \dots\dots \quad (2)$$

In the plot of  $1/v$  versus  $1/[SucCoA]$ , the slope and the intercept on the  $1/v$  axis are respectively equal to the following:

$$Intercept = \frac{1}{V_{max}} \left( 1 + \frac{K_m^{Gly}}{[Gly]} \right) \quad \dots\dots \quad (3)$$

$$Slope = \frac{K_m^{SCoA}}{V_{max}} \left( 1 + \frac{K_s^{Gly}}{[Gly]} \right) \quad \dots\dots \quad (4)$$

The intercept values were then replotted versus  $1/[Gly]$  to determine  $K_m^{Gly}$  and  $V_{max}$ , and the slope values were similarly replotted to determine  $K_m^{SCoA}$  and  $K_s^{Gly}$ . The non-linear regression analysis software program Igor Pro ver6.3 (WaveMetrics) was used for analysis.

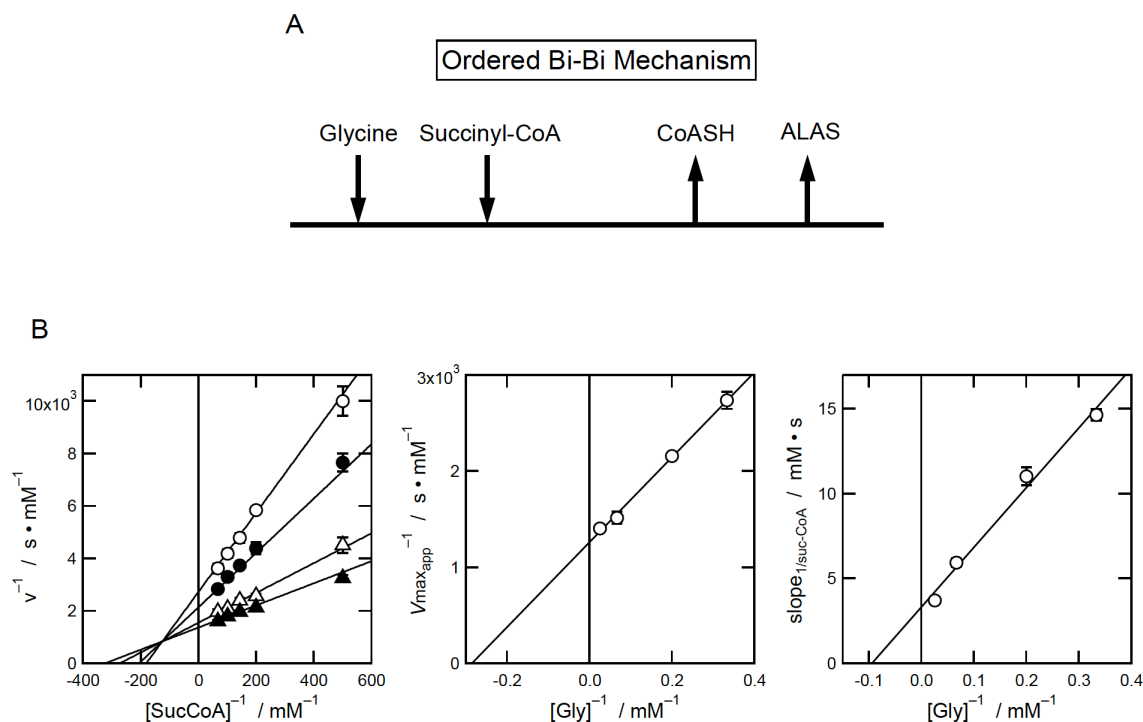

**Supplementary Figure S1: Steady state kinetic analysis of wild type enzyme of cALAS. (A)**

Reaction scheme depicting the steady-state ordered Bi–Bi mechanism of ALAS. (B) Kinetic characterization of the PLP form of cALAS wild type enzyme. The continuous spectrophotometric enzyme-coupled assay with cALAS and  $\alpha$ -KGD<sup>3</sup> was performed as described in the *Methods* section. The left panel is the primary plot of  $1/v$  versus  $1/[SucCoA]$  at different fixed glycine concentrations. The concentrations of glycine were 3.0 mM (open circles), 5.0 mM (closed circles), 15 mM (open triangles), and 40 mM (closed triangles). The concentrations of succinyl-CoA were 2.0, 5.0, 7.0, 10, and 15  $\mu$ M. The center panel is the replot of the  $1/v$ -axis intercepts of the left panel versus  $1/[Gly]$ . The  $K_m$  for glycine was calculated from the y-axis intercept, and  $V_{max}$  was estimated from the slope. The right panel is the replot of slope of the left panel versus  $1/[Gly]$ . The  $K_s$  for glycine and  $K_m$  for succinyl-CoA were calculated from the y-axis intercept and the slope of the right panel, respectively. Each solid line represents the theoretical curve according to the initial velocity equation on the ordered Bi-Bi mechanism (see the *Methods* section) using the kinetic parameters summarized in Table 1.

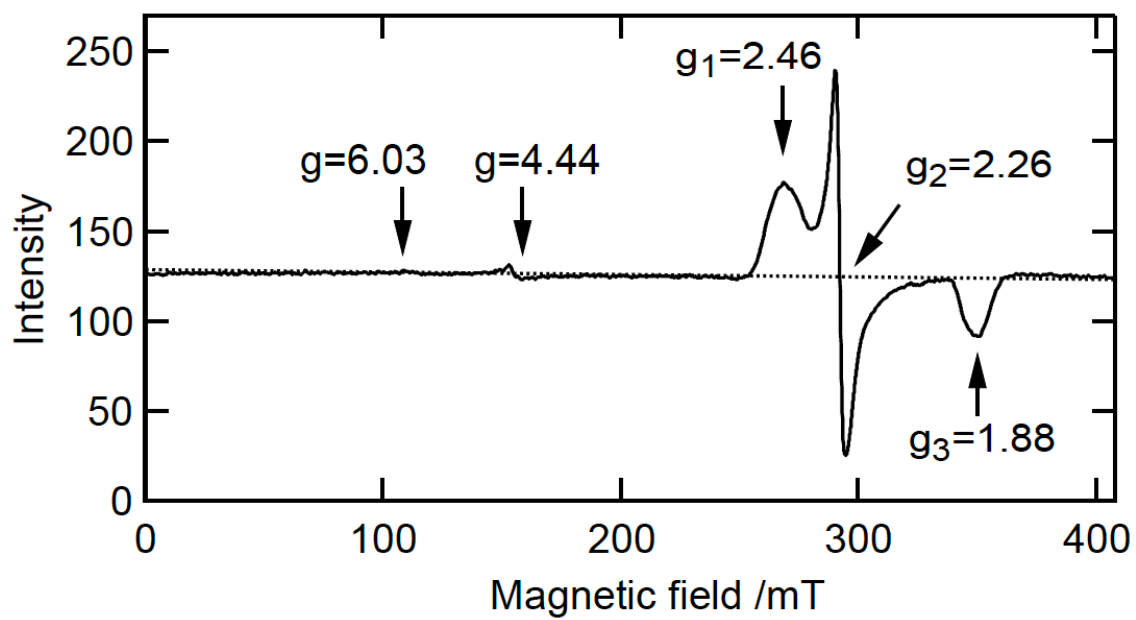

Supplementary Figure S2: EPR spectrum of the heme form of cALAS at 15 K.

### Supplementary Reference

- 1 Fanica-Gaignier, M. & Clement-Metral, J. 5-Aminolevulinic-acid synthetase of *Rhodopseudomonas spheroides* Y. Kinetic mechanism and inhibition by ATP. *Eur J Biochem* **40**, 19-24 (1973).
- 2 Segel, I. H. Enzyme kinetics : behavior and analysis of rapid equilibrium and steady-state enzyme systems. Chap.9, 560-574 (1975).
- 3 Hunter, G. A. & Ferreira, G. C. A continuous spectrophotometric assay for 5-aminolevulinate synthase that utilizes substrate cycling. *Anal Biochem* **226**, 221-224 (1995).
